# Supplementary material
Source: PubMed Central journal article supplement (PMC4112357)

## Supplementary Figures

**Supplementary Figure S1.** *CAF05 primes strong CD8 responses to SIINFEKL after vaccination with ovalbumin.*

Groups of 3 C57BL/6 mice were i.p. immunized twice with two weeks intervals using 5 µg Ovalbumin + CAF05. Non-stimulated cells from pooled spleens and PBMCs were isolated one-week post second immunization and subjected to MHC class I pentamer staining using PE-conjugated H2-Kb-SIINFEKL. Cells were gated as follows: singlets > lymphocytes > CD8 +ve > H2-Kb-SIINFEKL+ve. Bars show the frequency of SIINFEKL+ out of CD8 T cells.

**Supplementary Figure S2.** *TB10.3 P1 but not TB10.4 P1 primes high CD8 responses to the IMYNYPAM epitope when administered in the CAF05 adjuvant. However, once primed, both recombinant TB10.3 and TB10.4 trigger comparable ex vivo recall responses*

Groups of 3 C57BL/6 mice were immunized twice two weeks apart with 5 µg of either TB10.4 P1<sub>1-20</sub> + CAF05 or TB10.3 P1<sub>1-20</sub> + CAF05 by the i.p. route. Nine days after last immunization, CD8 responses to TB10.3/4<sub>4-11</sub> were evaluated in splenocytes from individual mice by intracellular flowcytometry to establish the frequency of IFN-γ producing CD8 T cells. Cells were stimulated either with rTB10.3, rTB10.4 or the 9-meric peptide TB10.3/4<sub>3-11</sub>. Background subtraction was performed. Two-Way ANOVA, vaccine antigen P < 0.001, recall antigen ns, interaction ns. One out of three comparable experiments shown.

Supplementary Figure S1

Ovalbumin

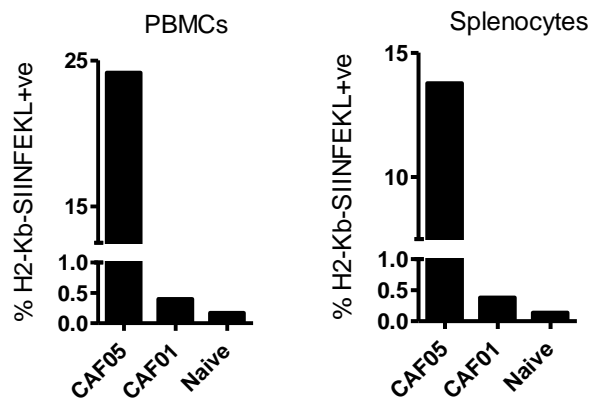

Supplementary Figure S2

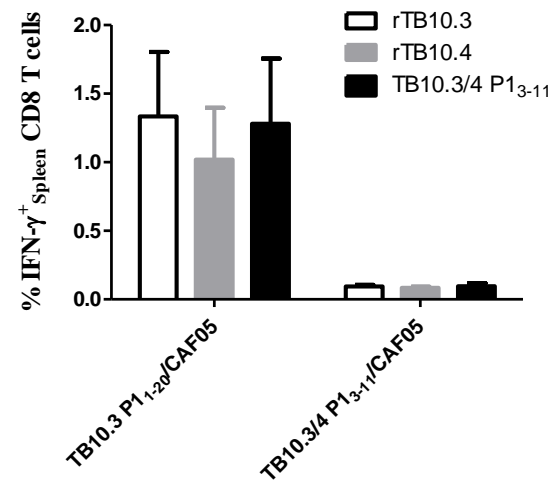

Supplement: NIHMS597397-supplement-Supporting_Information.pdf [file NIHMS597397-supplement-Supporting_Information.pdf]
